# Supplementary material
Source: PubMed Central journal article supplement (PMC10527034)
Supplement: NIHMS1909140-supplement-2.pdf [file NIHMS1909140-supplement-2.pdf]

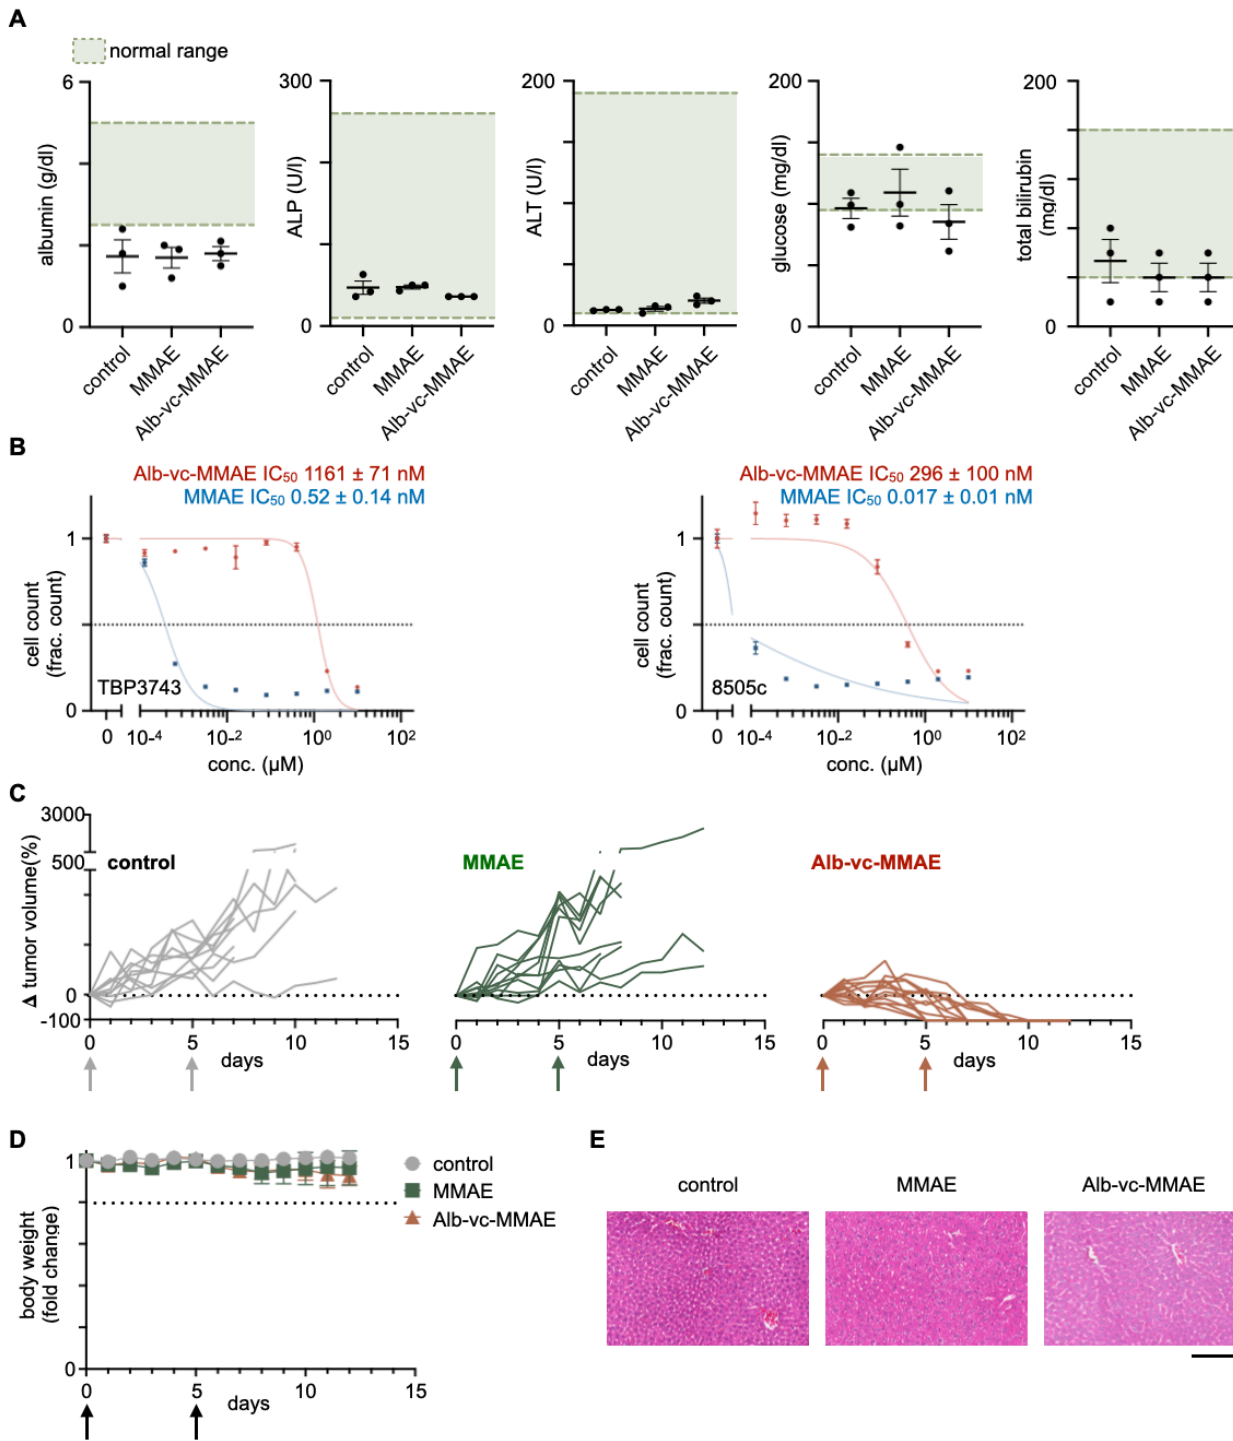

**Supplementary Figure S2. Assessment of albumin-bound chemotherapy efficacy and toxicity.** **A**, Mouse serum was collected when animals reached the humane experimental endpoint or on day 12, and albumin, alkaline phosphatase (ALP), alanine transaminase (ALT), glucose, and total bilirubin concentrations were measured. Data are means  $\pm$  s.e.,  $n = 4$  mice per cond., and literature-based mouse serum normal ranges are noted for reference(65-66). **B**, Cytotoxicity curve and  $IC_{50}$  values of 72 h treatment of MMAE and Alb-vc-MMAE in 8505c and TBP3743 cells, measured using a resazurin-based (PrestoBlue) assay. Data are means  $\pm$  s.e., from  $n = 2$  independent experiments. **C**, TBP3743 individual tumor growth following vehicle, MMAE, or Alb-vc-MMAE treatment on days indicated by arrows(1 $\mu$ mol/kg MMAE),  $N \geq 10$  tumors per group, corresponding with Figure 2 D-F. **D**, Mouse body weights were measured daily following tumor induction and treatments on day 0 and day 5 (1 $\mu$ mol/kg MMAE). Dashed line denotes 20% weight loss threshold for humane experimental endpoint criteria, which was not reached in any subject. **E**, Representative histology of livers stained with hematoxylin and eosin ( $n = 4$  per cond.), scale bar = 400 $\mu$ m.
