# Supplementary material
Source: PubMed Central journal article supplement (PMC10527034)
Supplement: NIHMS1909140-supplement-4.pdf [file NIHMS1909140-supplement-4.pdf]

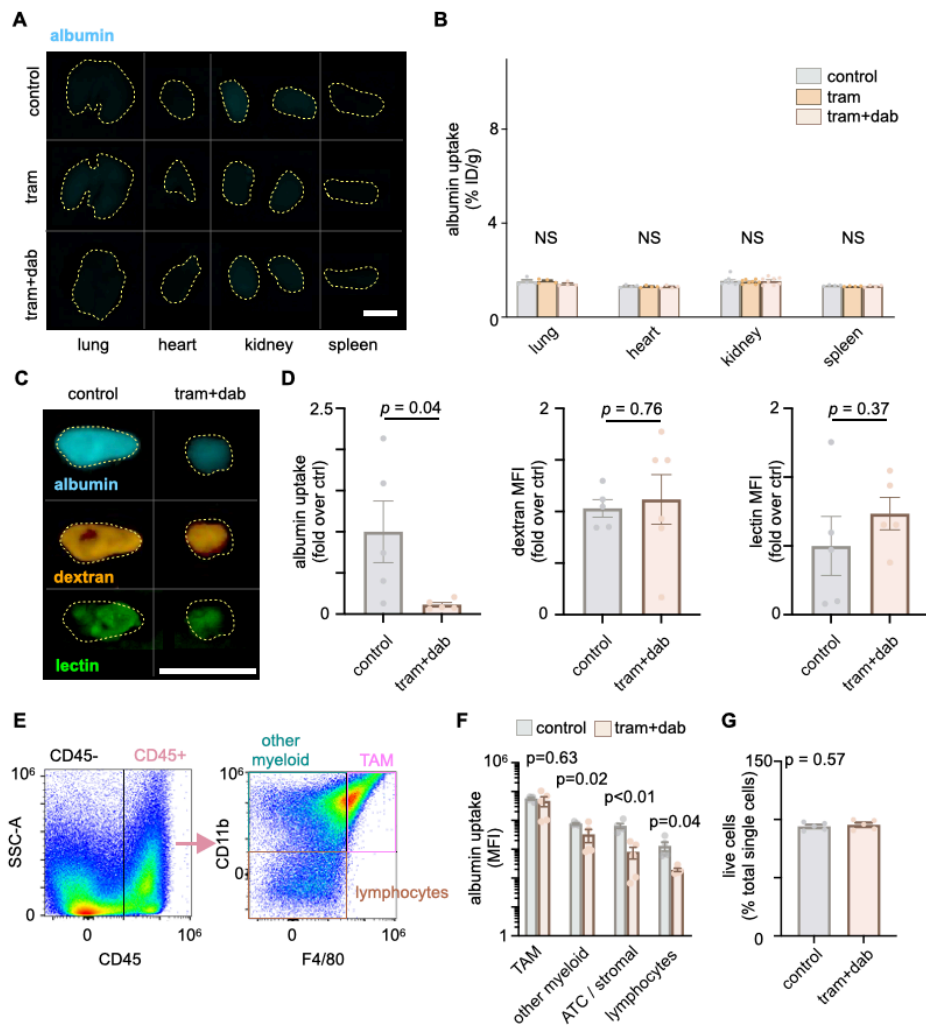

**Supplementary Figure S4. MAPK pathway kinase inhibitors show little effect on albumin uptake in non-tumor tissues, and lectin and dextran uptakes in tumor tissues.** **A-B**, Representative fluorescence reflectance images (**A**, scale bar, 5mm) and biodistribution quantification (**B**, data are means  $\pm$  s.e., from  $n = 4$  mice per group, one-way ANOVA/Tukey) for albumin uptake in the lung, heart, kidney and spleens of tumor-bearing mice. Data correspond with **Fig. 5D**. **C-D**, Representative fluorescence reflectance images (**C**) and quantification (**D**) of fluorescent albumin, dextran, and lectin uptake. Data are means  $\pm$  s.e. from  $n=5$  per group, using two-tailed t-tests compared to the control. **E-G**, Flow cytometry gating scheme for assessing ATC tumor cellular composition and albumin uptake (**E**), albumin uptake on a per cell basis(**F**), and live cell percentage measurement based on LIVE/DEAD staining (**G**), following trametinib and dabrafenib combination treatment, corresponding to **Fig. 6C-E**. Data are means  $\pm$  s.e., from  $n = 5$  per cond., using two-tailed t-test.
