# Supplementary material
Source: PubMed Central journal article supplement (PMC10527034)
Supplement: NIHMS1909140-supplement-6.pdf [file NIHMS1909140-supplement-6.pdf]

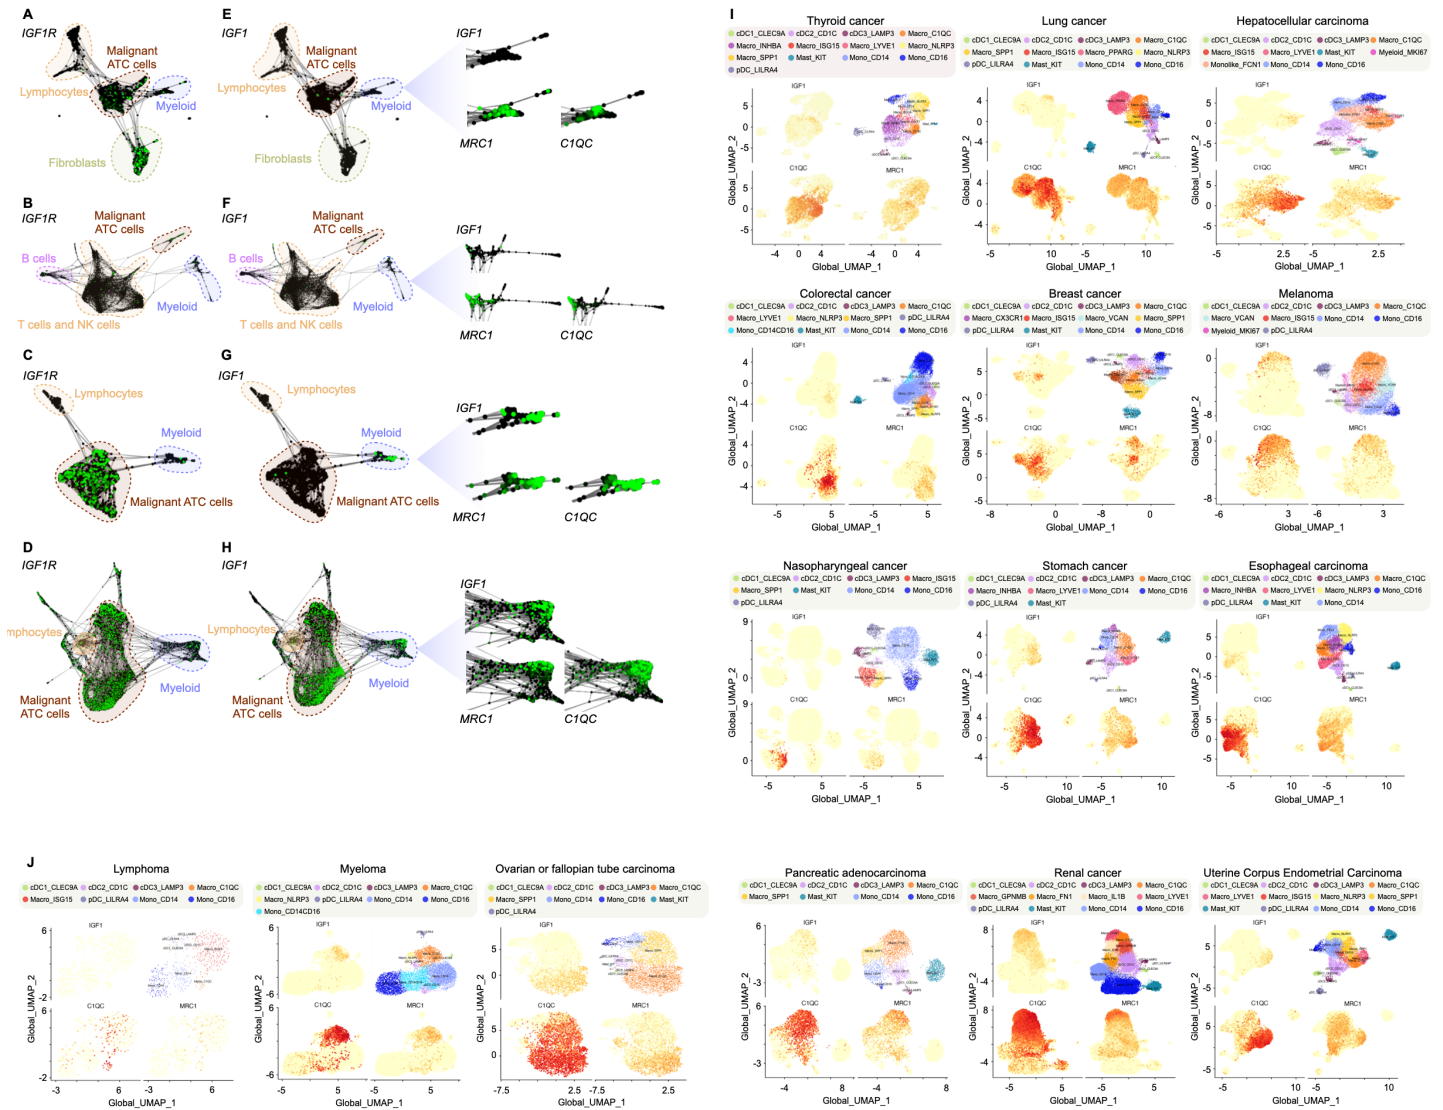

**Supplementary Figure S6. *IGF1R* and *IGF1* expression in four individual ATC patients, and *IGF1* expression in myeloid cell subsets.** A-H, Single-cell RNA-sequencing (scRNA-seq) of ATC tumors in four individual patients by SPRING visualization, shown with cells pseudocolored according to *IGF1R* (A-D) and *IGF1* (E-H) expression. Corresponds to analysis in Fig. 6 (GSE148673(35)). I-J, *IGF1*, *MRC1* (also known as CD206) and *C1QC* expression in myeloid cells for listed cancer types. Different dendritic cells(DC), macrophages(Macro), mast cells(Mast) and monocytes(Mono) populations are indicated with different colors at top right. Data, cell clustering, and subtype classifications are from single cell RNA-seq data visualization and analysis(scDVA), and show *IGF1* expression in cells defined as *C1QC* macrophages in most cancer types examined(37).
