# Supplementary material
Source: PubMed Central journal article supplement (PMC10527034)
Supplement: NIHMS1909140-supplement-7.pdf [file NIHMS1909140-supplement-7.pdf]

**A**

| Plasmid                                                                                      | Source                                                                           | Protocol Specifics                                                                                                                                                                                                                                                                                                                                                                               |
|----------------------------------------------------------------------------------------------|----------------------------------------------------------------------------------|--------------------------------------------------------------------------------------------------------------------------------------------------------------------------------------------------------------------------------------------------------------------------------------------------------------------------------------------------------------------------------------------------|
| Triple Reporter ERK kinase translocation mTurquoise (ERK-KTR), H2B-Venus and Geminin-mCherry | Gift from Dr. Luca Gerosa and Dr. Peter Sorger at Harvard Medical School (30-31) | Co-transfection of TBP3743 with piggybac transposase vector at 1:1 ratio with lipofectamine, selecting with 5 µg/ml puromycin (Gibco) and sorted by FACS                                                                                                                                                                                                                                         |
| pHAGE-BRAF <sup>FV600E</sup>                                                                 | Addgene plasmid no. 116204, a gift from Gordon Mills & Kenneth Scott             | 5000 Nthy-ori-3-1 or TPC1 cells were seeded into each well of 96-well image plates (Ibidi). After overnight incubation, fresh media containing 0.25 ng/µl of each plasmid DNA was added for 72 h                                                                                                                                                                                                 |
| pHAGE-BRAF <sup>WT</sup>                                                                     | Addgene plasmid no. 116719, a gift from Gordon Mills & Kenneth Scott             |                                                                                                                                                                                                                                                                                                                                                                                                  |
| pHAGE_puro                                                                                   | Addgene plasmid no. 118692, a gift from Christopher Vakoc                        |                                                                                                                                                                                                                                                                                                                                                                                                  |
| pBabe-KRAS <sup>G12D</sup>                                                                   | Addgene #58902, a gift from Christopher Vakoc                                    |                                                                                                                                                                                                                                                                                                                                                                                                  |
| pBabe-KRAS <sup>WT</sup>                                                                     | Addgene #75282, a gift from Christopher Vakoc                                    |                                                                                                                                                                                                                                                                                                                                                                                                  |
| IGF1R siRNA SMARTPool                                                                        | Dharmacon                                                                        | 7000 8505c cells or 6000 Nthy-ori-3-1 cells were seeded into each well of 96-well image plates (Ibidi) or 0.5 million 8505c cells were seeded into 10 cm tissue culture plates overnight for IGF1R siRNA transfection. Media was replaced with growth media containing 25 nM siRNA in transfection reagent (Dharmacon) and incubated for another 72 h prior to treatment with albumin or dextran |
| PTEN siRNA SMARTPool                                                                         | Dharmacon                                                                        |                                                                                                                                                                                                                                                                                                                                                                                                  |
| non-targeting siRNA control pool                                                             | Dharmacon                                                                        |                                                                                                                                                                                                                                                                                                                                                                                                  |

**B**

| Cell Line    | Source                                            | RRID      |
|--------------|---------------------------------------------------|-----------|
| 8505c        | Purchased from DSMZ                               | CVCL_1054 |
| THJ-21t      | abmgood                                           | CVCL_W921 |
| TPC1         | Dr. F. Frasca (University of Catania, Italy)      | CVCL_6298 |
| BCPAP        | Dr. G. Damante (University of Udine, Italy)       | CVCL_0153 |
| Nthy-ori-3-1 | Dr. Raj Gopal (MGH)                               | CVCL_2659 |
| FTC133       | European Collection of Authenticated Cell Culture | CVCL_1219 |
| FTC236       |                                                   | CVCL_2446 |

**C**

| Antibody                          | Source         | Category # | RRID        |
|-----------------------------------|----------------|------------|-------------|
| p-AMPK                            | CST            | #2535      | AB_331250   |
| p-IGF1R                           | CST            | #3918      | AB_10548764 |
| p-ERK1/2                          | CST            | #4370      | AB_2315112  |
| IGF1R                             | CST            | #9750      | AB_10950969 |
| AMPK                              | CST            | #2603      | AB_490795   |
| ERK                               | CST            | #4695      | AB_390779   |
| PTEN                              | CST            | #9559      | AB_390810   |
| β-actin                           | CST            | #3700      | AB_2242334  |
| anti-rabbit IgG antibody AF647    | Invitrogen     | #A-21245   | NA          |
| rat anti-mouse CD16/CD32 antibody | BD Biosciences | #553141    | AB_394656   |
| CD45                              | BioLegend      | #103151    | AB_2565884  |
| CD11b                             | BioLegend      | #101210    | AB_312793   |
| F4/80                             | BioLegend      | #123118    | AB_893477   |
| CD206                             | BioLegend      | #141727    | AB_2565822  |
| CD80                              | BioLegend      | #104729    | AB_11126141 |
| CD86                              | BioLegend      | #105115    | AB_493601   |

**Supplementary Table S1. Biological and chemical reagents and their sources.** This table reports detailed information of plasmids, siRNA and transfection protocols (A), human cell lines (B), and antibodies (C).
